# Supplementary material
Source: Springer Nature journal article supplement (https://www.springermedizin.de/resource/supplementary/12936_2011_1690_MOESM1_ESM.pdf/9541518)
Supplement: MOESM1 [file 9541518]

|     |                                                                                                           |          |
|-----|-----------------------------------------------------------------------------------------------------------|----------|
| 1   | T G T A T A G A C A C C A A T G T G C C T G A T A A T G C A G C C T G C T A T A G G T A C T T G G A C G G | ICB10ori |
| 1   | T G C A T T G A T A C C A A C G T T C C A G A C A A C G C G G C C T G C T A C A G G T A T C T G G A T G G | MLCICB10 |
| 54  | A A C G G A A G A A T G G A G A T G C T T G T T A A C C T T T A A A G A A G A A G G C G G C A A G T G T G | ICB10ori |
| 54  | T A C G G A G G A A T G G C G C T G C T T G T T G A C A T T C A A G G A G G A A G G C G G C A A G T G C G | MLCICB10 |
| 107 | T G C C A G C A T C G A A T G T G A C T T G T A A G G A T A A C A A T G G T G G T T G T G C C C C T G A A | ICB10ori |
| 107 | T G C C T G C A T C G A A C G T C A C C T G T A A G G A C A A T A A C G G G G G A T G C G C T C C G G A G | MLCICB10 |
| 160 | G C T G A A T G T A A A A T G A C G G A C A G C A A T A A A A T C G T C T G T A A A T G T A C T A A A G A | ICB10ori |
| 160 | G C T G A G T G T A A G A T G A C C G A C A G T A A T A A G A T C G T A T G C A A G T G T A C T A A A G A | MLCICB10 |
| 213 | A G G T T C T G A G C C A C T C T T T G A G G G A G T T T T C T G T A G C T C C T C C A G C T T C C T A A | ICB10ori |
| 213 | G G G C T C C G A G C C A C T C T T T G A G G G G G T C T T C T G C T C C A G C T C T T C T T T T C T C T | MLCICB10 |
| 266 | G C T T G T C C T T C T T G T T G C C C A T G T T G C T T T T C C T C C T G T G C A T G G A G C T T       | ICB10ori |
| 266 | C A C T T A G C T T C C T G T T G C C C A T G C T C C T C T T C C T A T T A T G T A T G G A G C T C       | MLCICB10 |
